# Supplementary material
Source: publisher site journal article supplement (https://www.spandidos-publications.com/302/downloadSupplementary)

Figure S1. Images of cell morphology. The effect of matrine on cell survival was not associated with necrosis when the cells were treated with high concentrations of matrine. Ctrl, control; M80, 80  $\mu$ M matrine; M200, 200  $\mu$ M matrine.

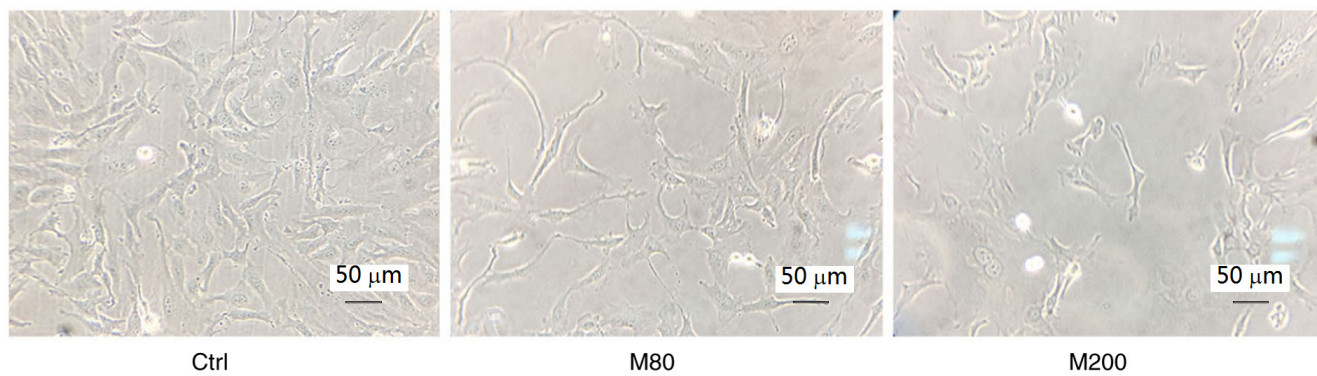

Supplement: Supplementary file 1 [file downloadSupplementary]
